# Supplementary material
Source: PubMed Central journal article supplement (PMC11416019)

Fig. S1

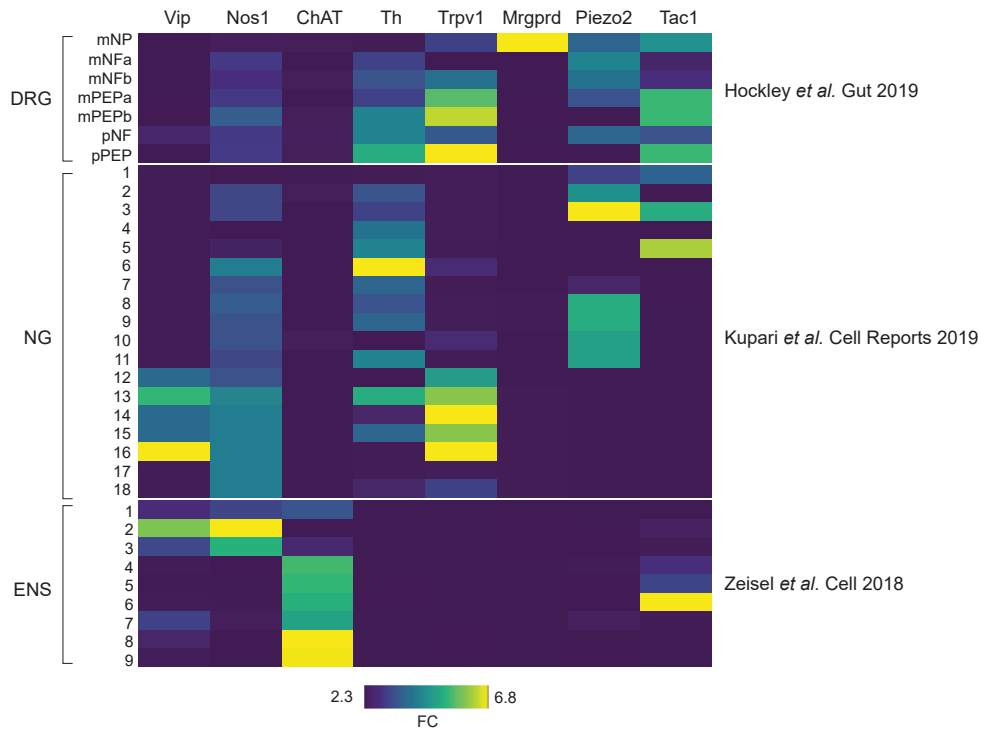

Fig. S2

A

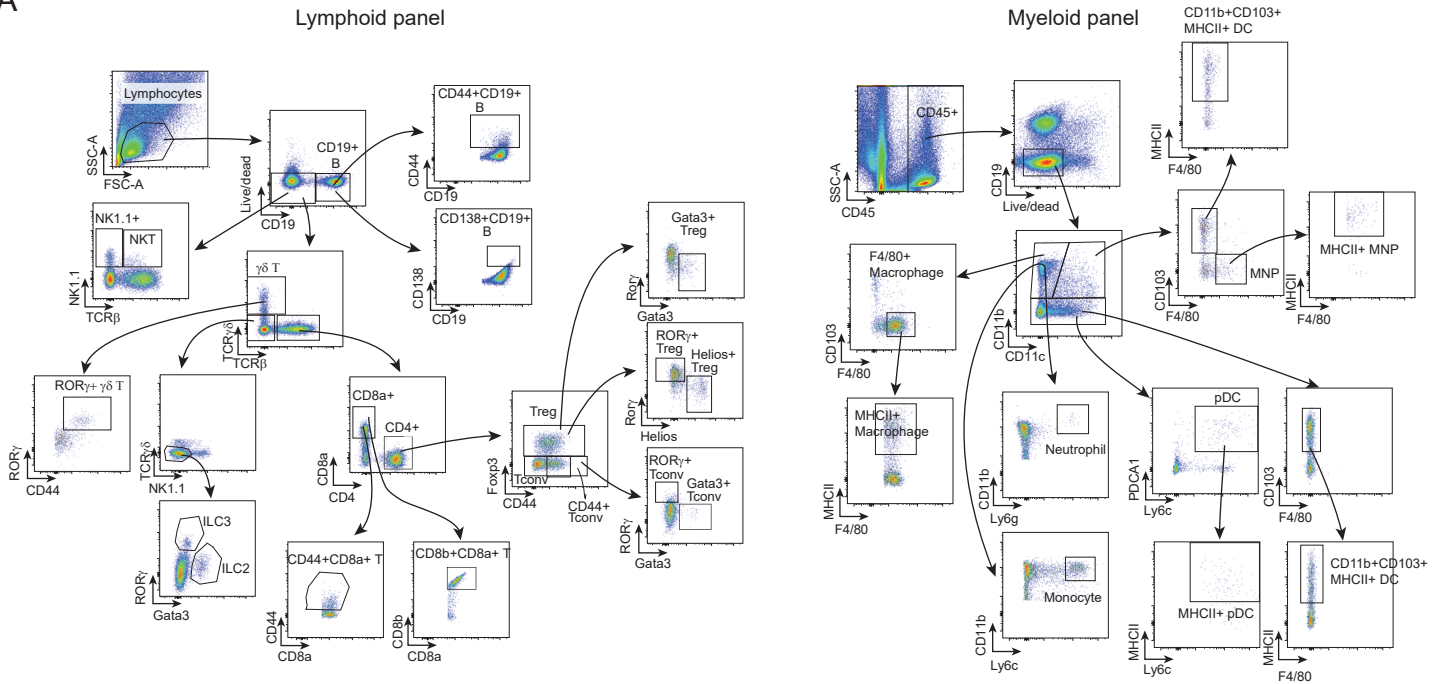

B

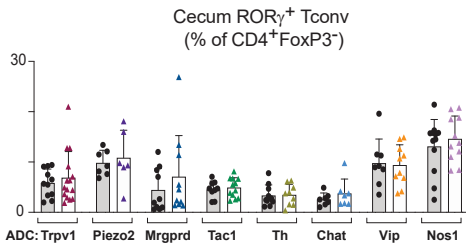

C

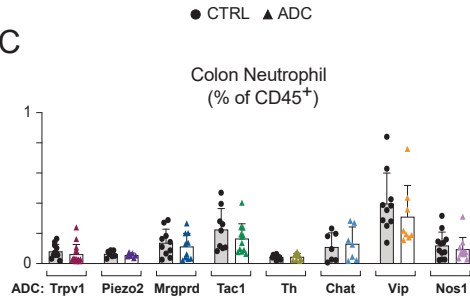

D

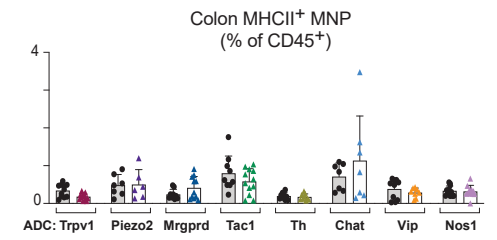

E

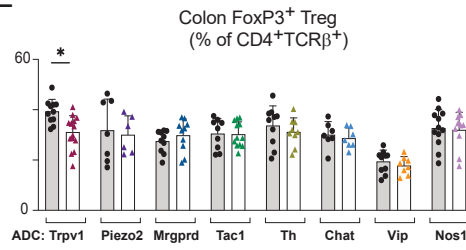

F

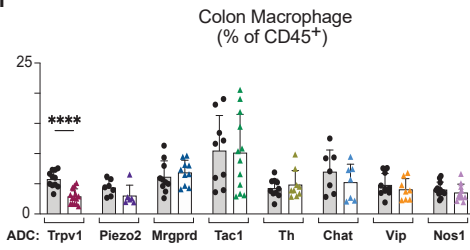

G

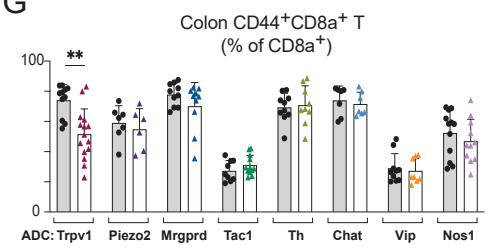

H

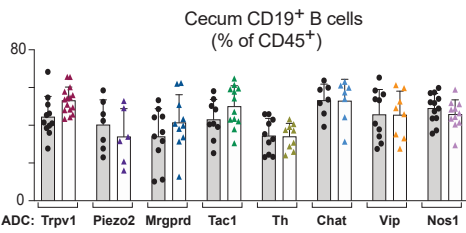

I

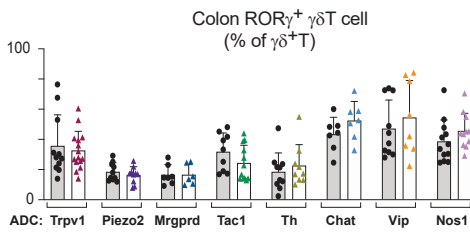

J

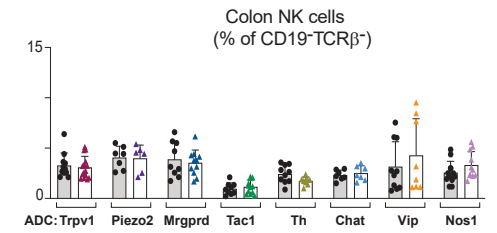

Fig. S3

● CTRL ▲ Trpv1-ADC

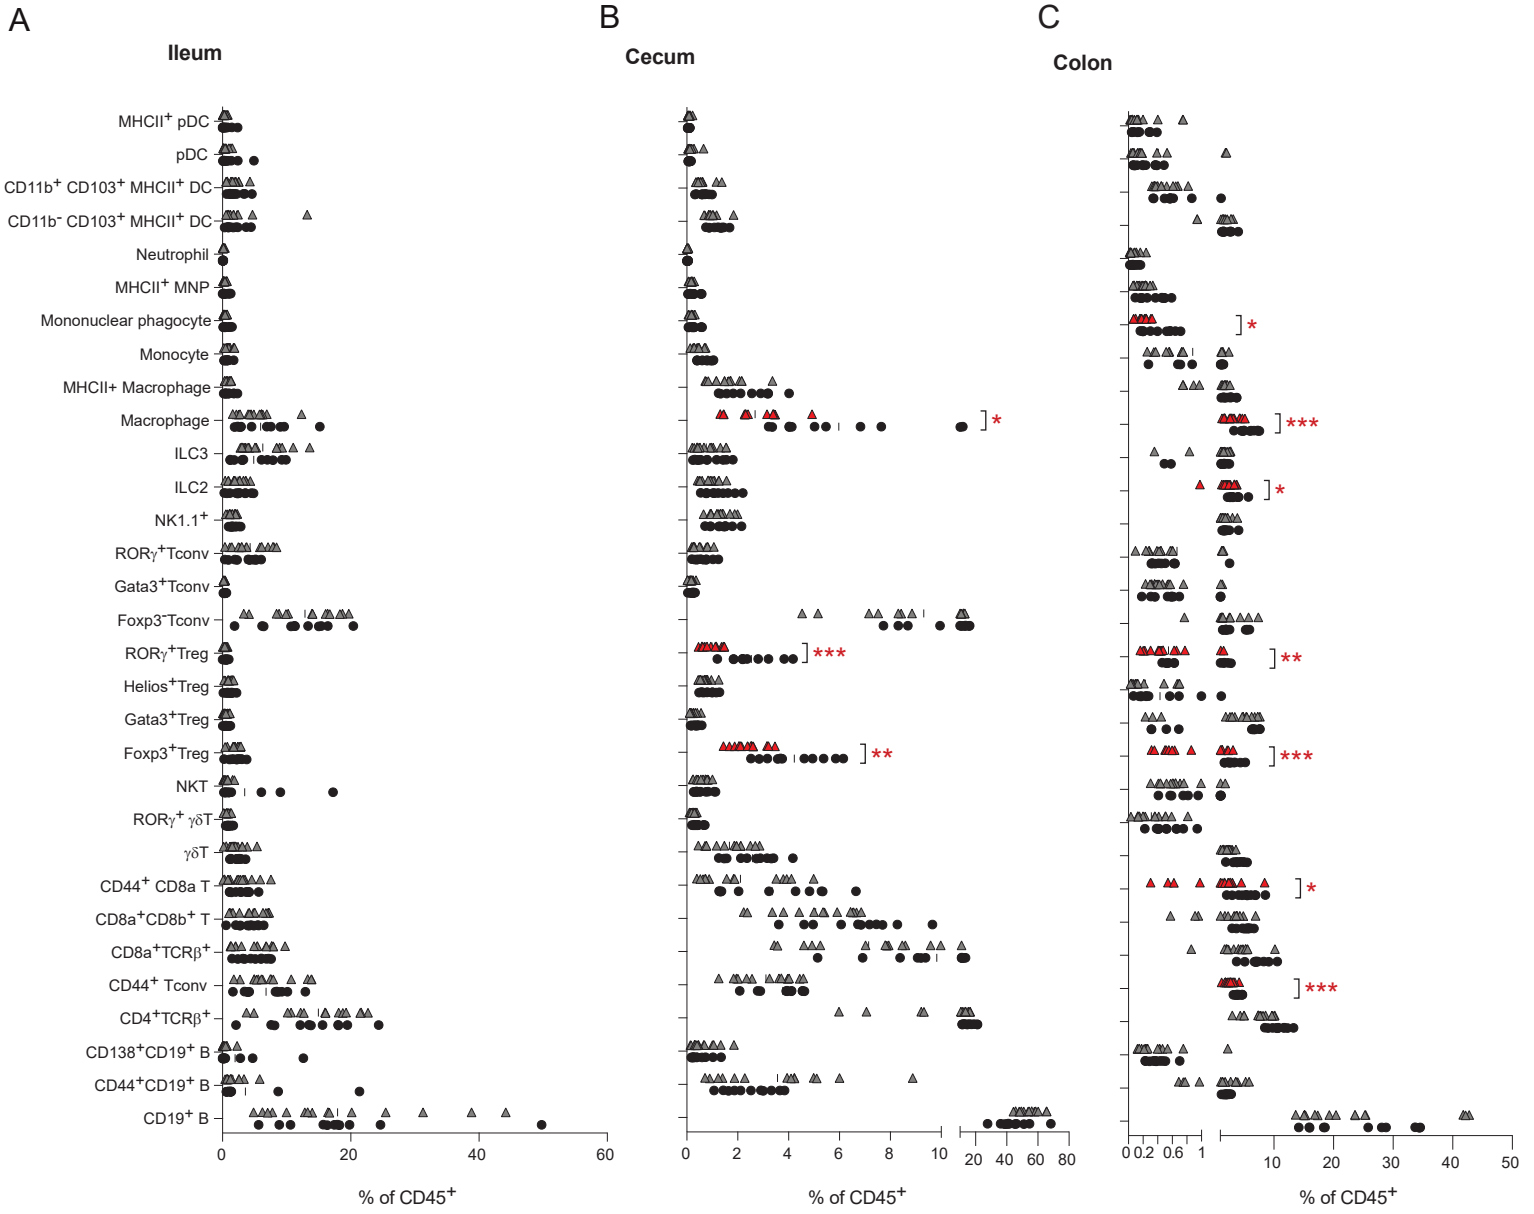

Fig. S4

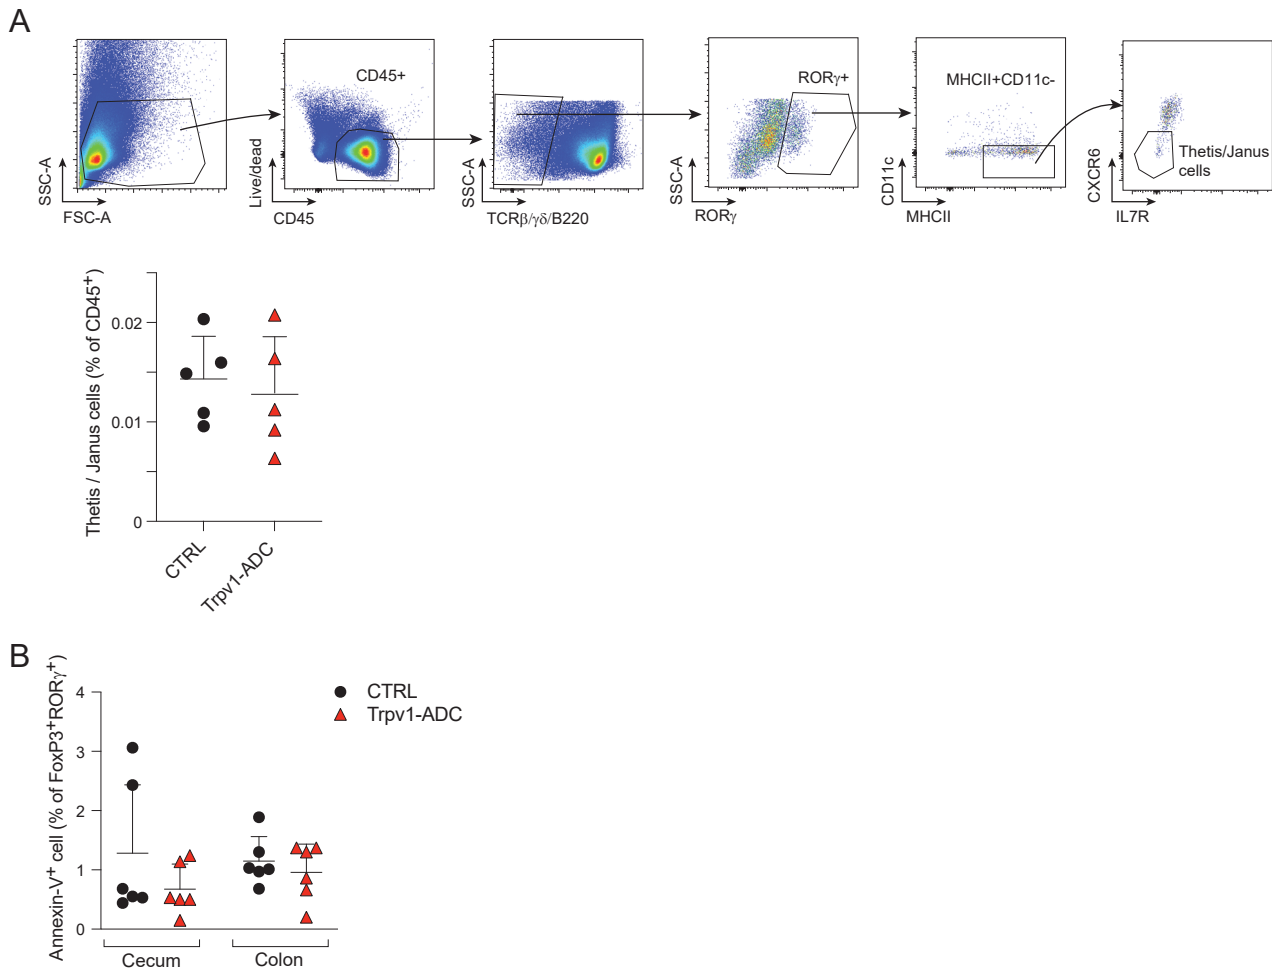

Fig. S5

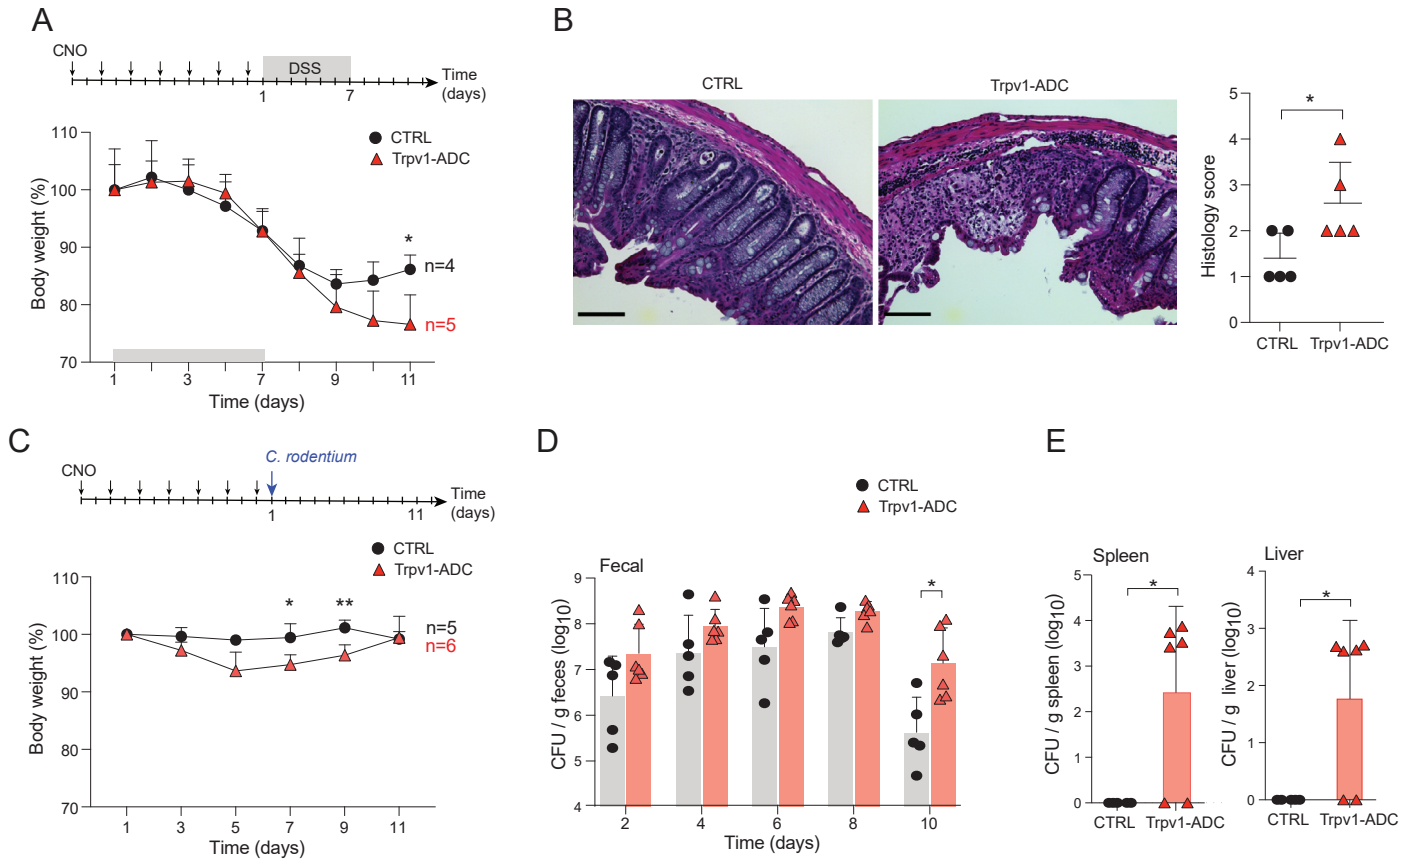

Fig. S6

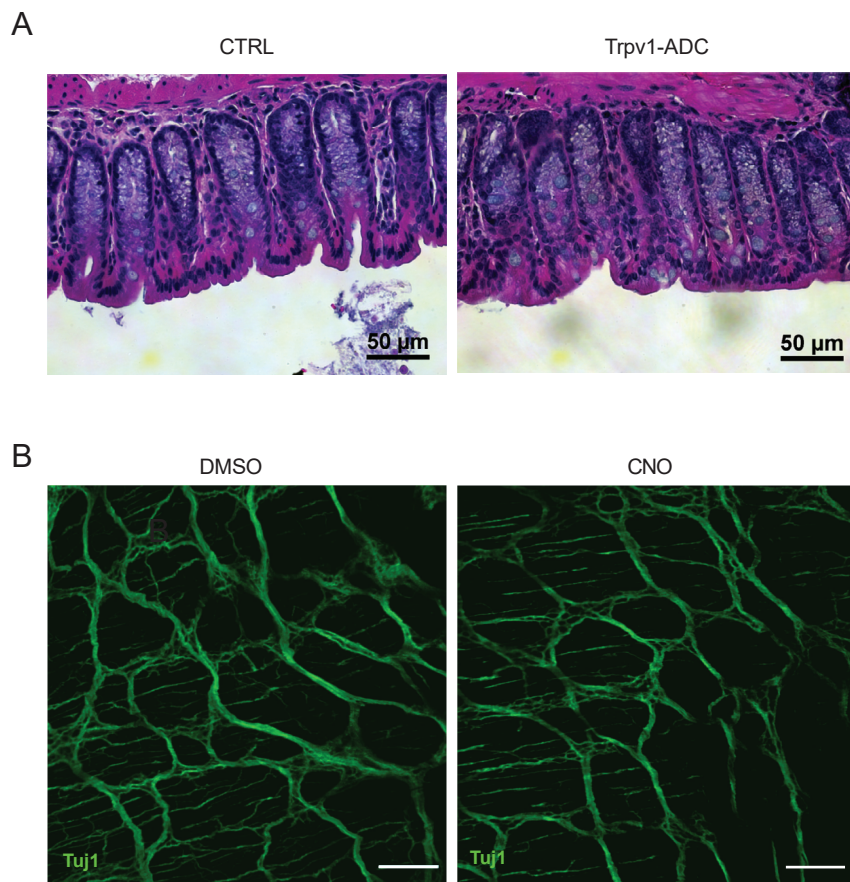

Fig. S7

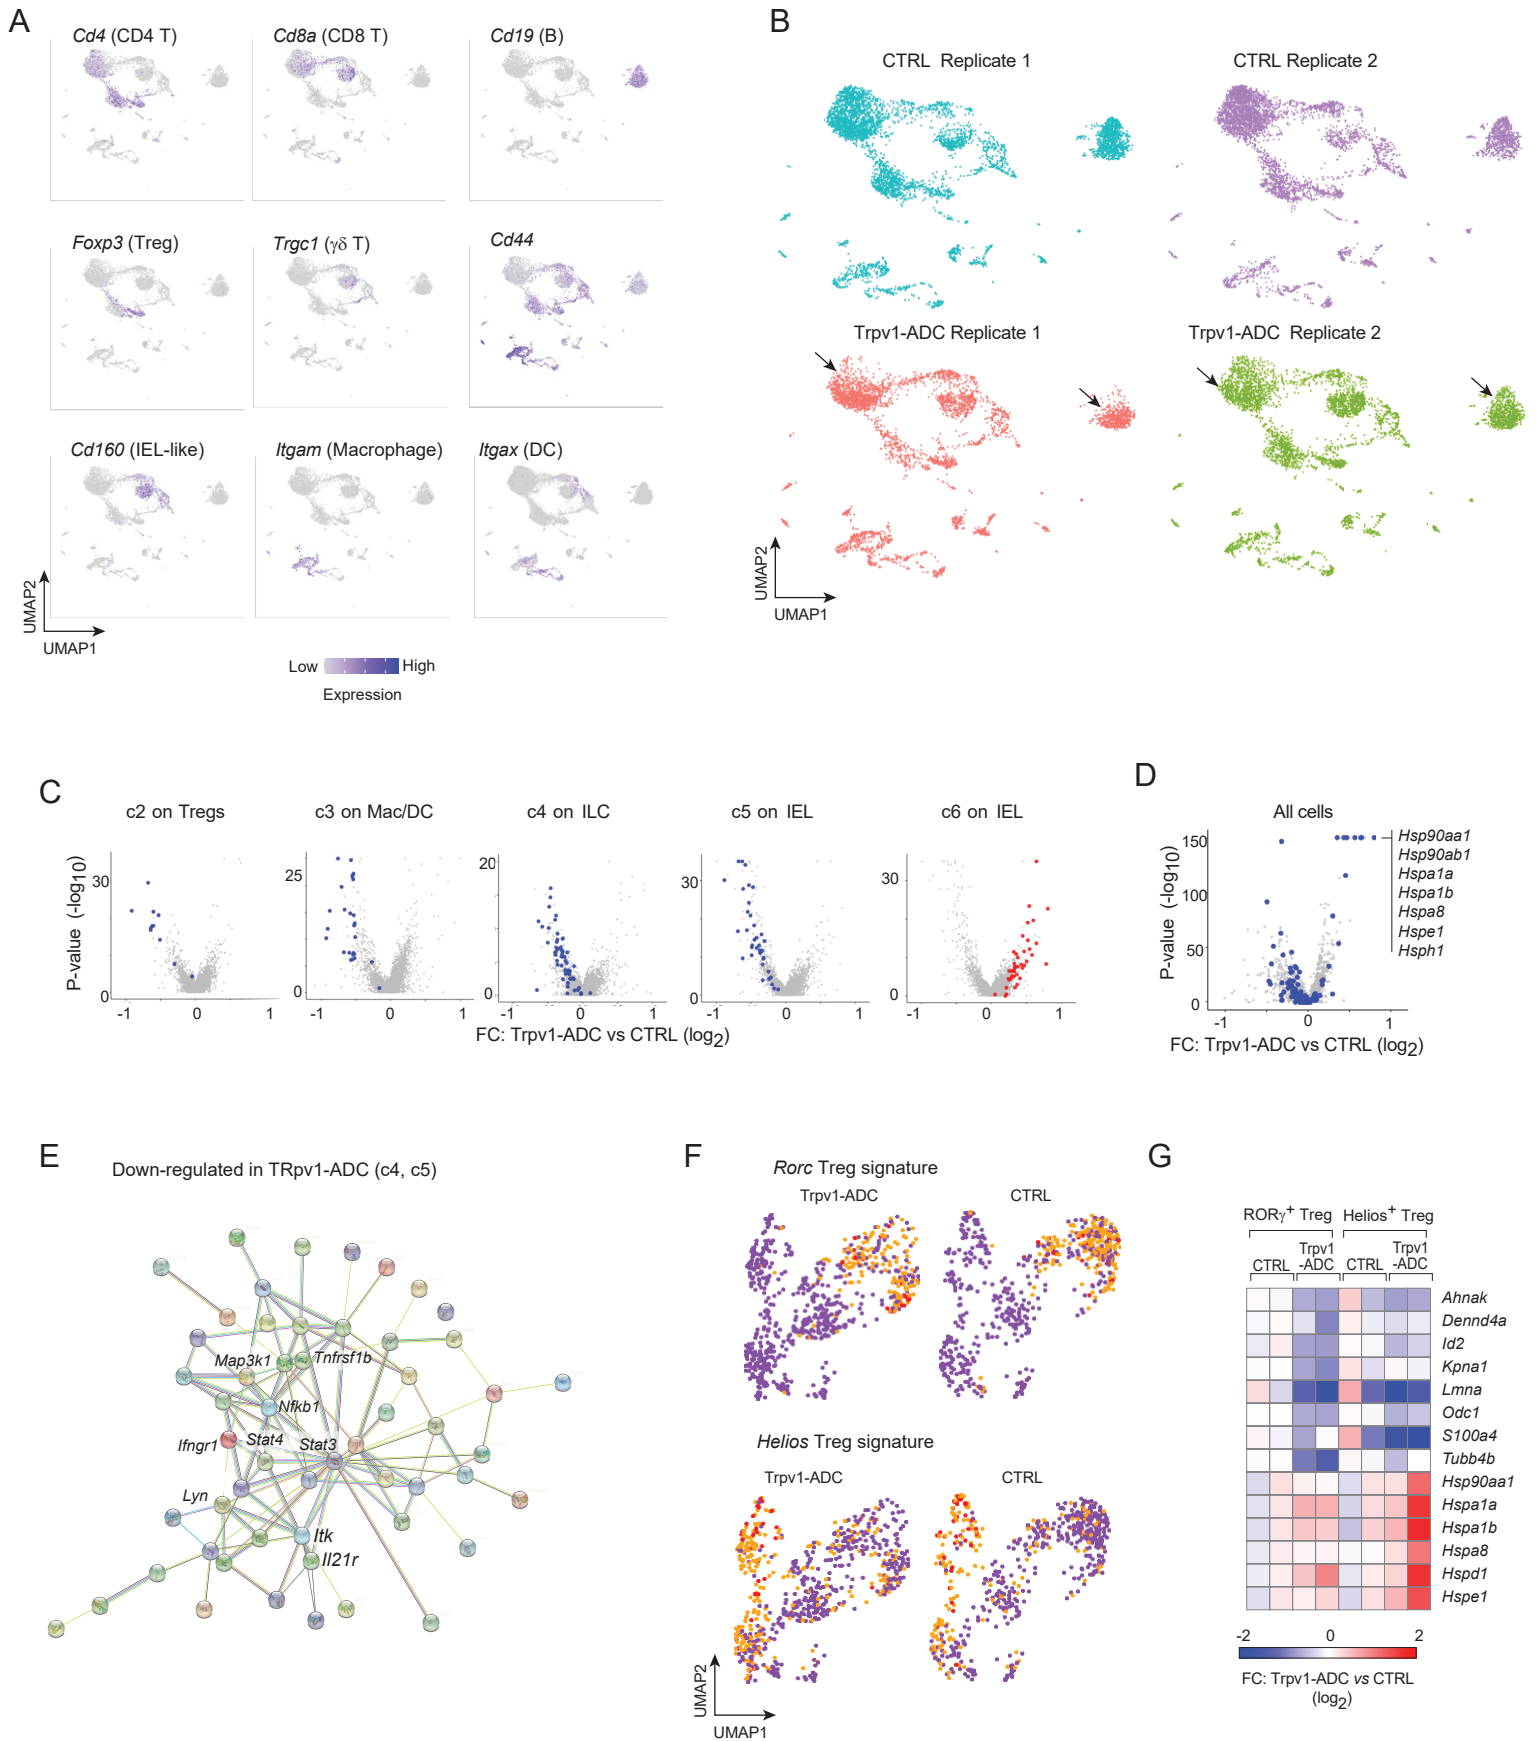

Fig. S8

● CTRL ▲ Trpv1-ADC

A

intranodose

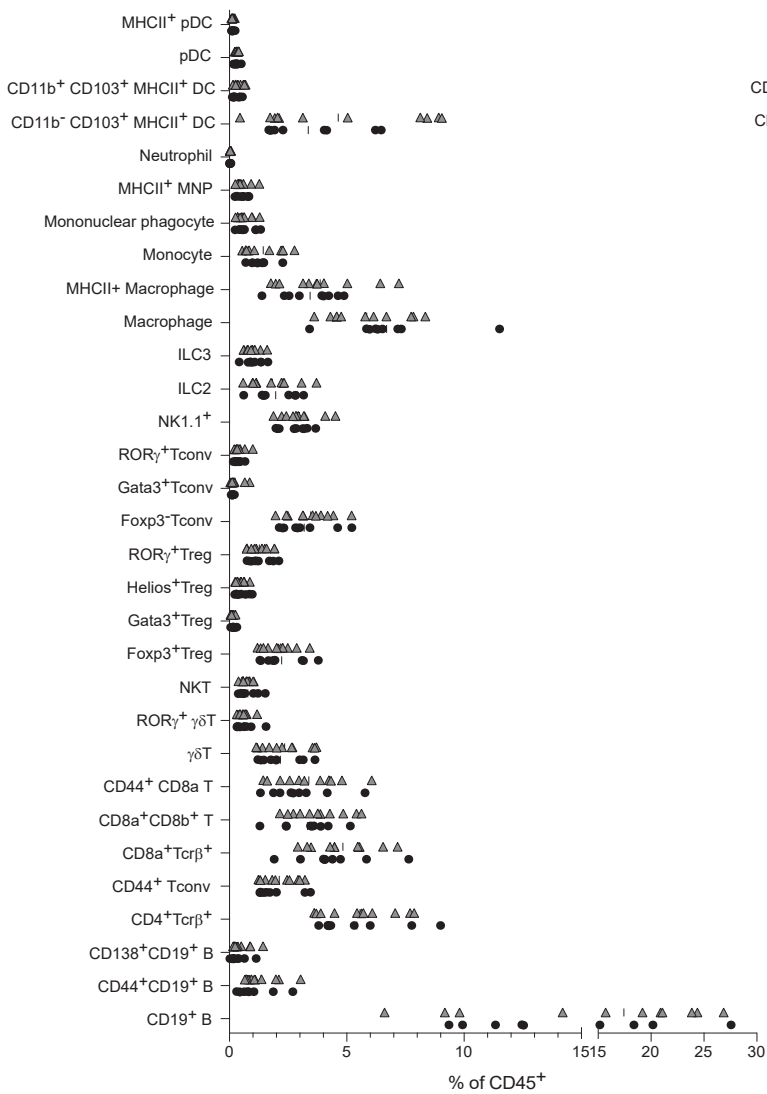

B

intrathecal

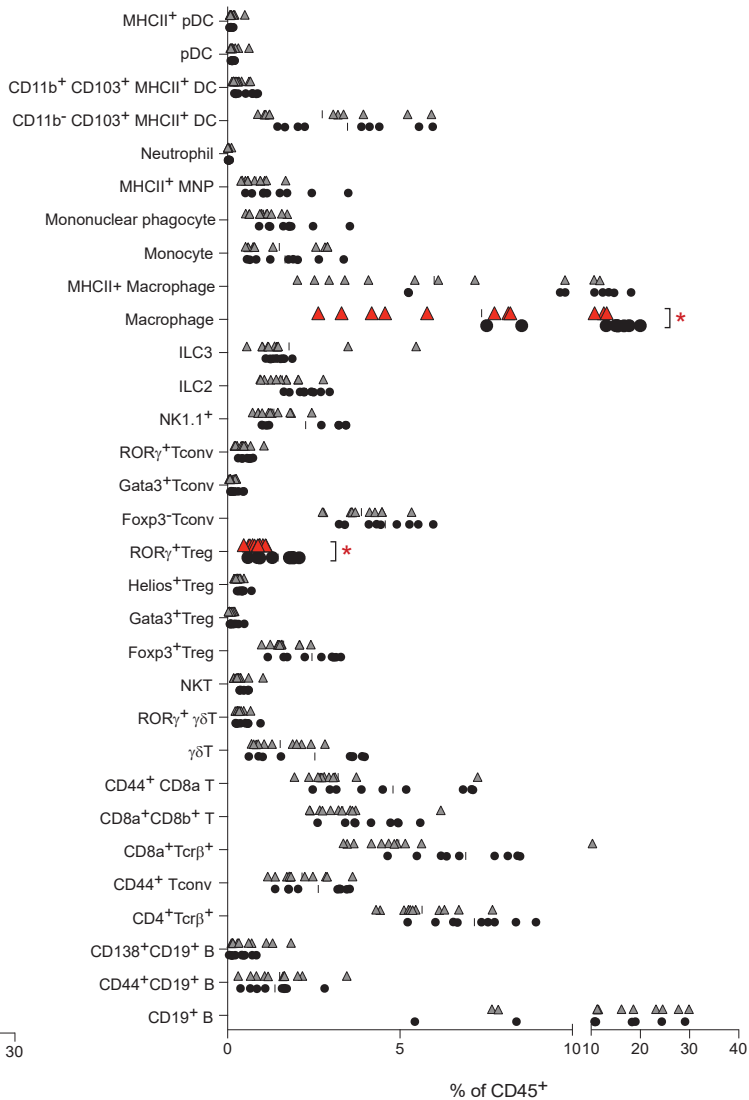



Fig. S9

A

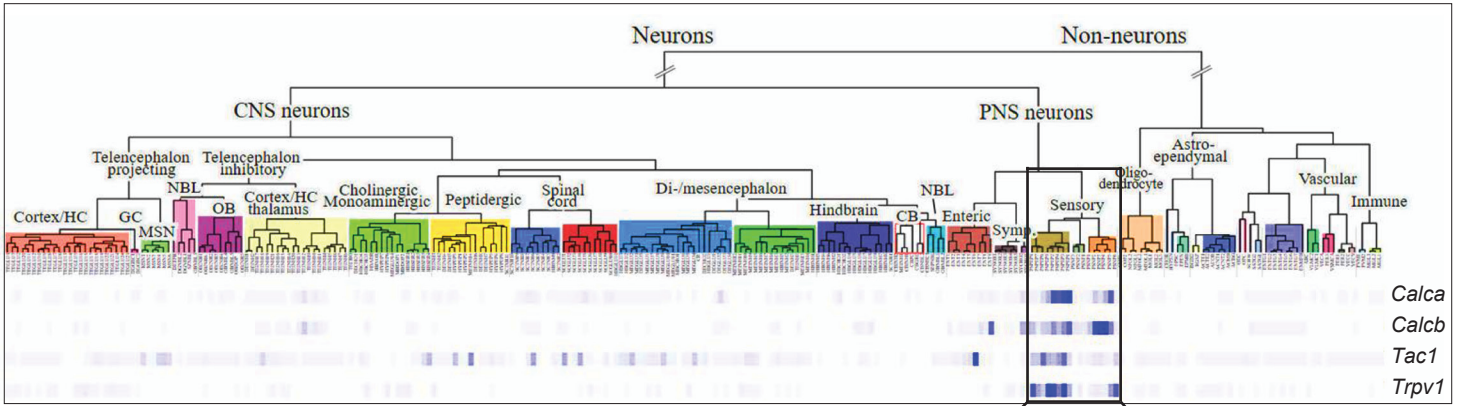

B

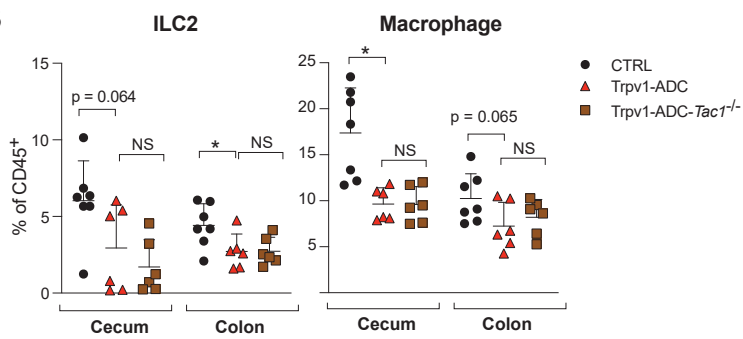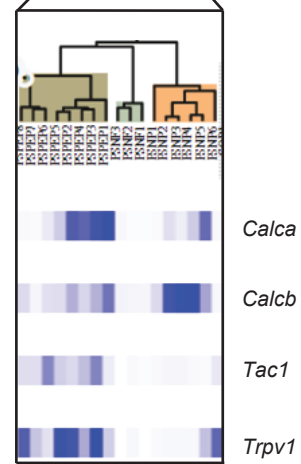

C

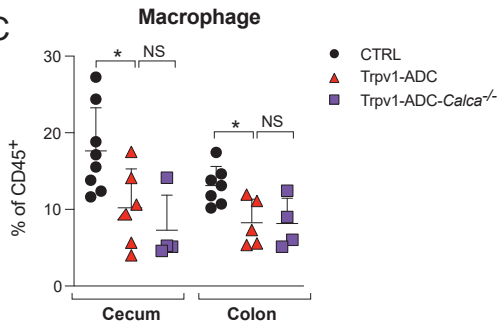

D

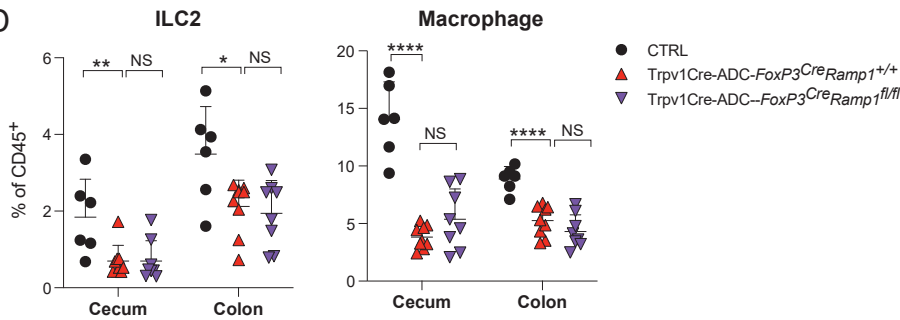

Supplement: NIHMS2018375-supplement-Supplemental_Figures.pdf [file NIHMS2018375-supplement-Supplemental_Figures.pdf]
